# Supplementary material for: Factors influencing scar formation following Bacille Calmette-Guérin (BCG) vaccination
Source: PubMed Central journal article supplement (PMC10126857; doi:10.1016/j.heliyon.2023.e15241), 2023-04-06
Supplement: mmc2.pdf [file mmc2.pdf]

## Supplemental Material 1: 12-month vaccine site questionnaire

### Vaccine site reaction

---

We would love to see a picture of your vaccination site, even if it is not visible anymore. How to take the best picture:

- Attach a standard-sized object to your upper arm (e.g. coin or measuring tape or ruler) using rolled up sticky tape or BluTack, adjacent to the vaccination site.
  - Hold your phone approx. 15cm away from the area being photographed.
  - Ensure the entire injection site and coin are in the photo and in focus.
- 

Please upload your photo (vaccine site) here.

---

Do you have a scar (or bump or mark) at your BRACE vaccination site?

(Please answer 'no' if there is nothing to see)

- Yes
  - No
- 

Which of the following best describes the vaccination site today?

(Please do not hesitate to contact us via email or phone if you are concerned.)

- Skin colour mark without redness (normal scar formation)
  - Red mark
  - Red mark with discharge
  - Red mark with crusting
  - Ulcer (open sore)
  - Vaccination site still looks 'angry' with swelling and/or redness all around it
  - An abnormal thick scar
  - Other
- 

If other, please describe:

---

The scar (or bump or mark) is:

- Palpable only, not visible
  - Visible only, not palpable
  - Visible and palpable
  - Visible and palpable with crust
- 

What do you think about your scar?

- I don't mind having the scar at all
  - I would rather not have a scar, but understand this is unavoidable
  - I'm dissatisfied with the scar
- 

Why are you dissatisfied with your scar?

- I didn't expect to have a scar
  - It is worse than I expected
  - Other
- 

If other, please describe:

---

Do you regret having the vaccine because of the scar?

- No, I don't regret having the vaccine
- Yes, I regret having the vaccine
